# Supplementary material
Source: Springer Nature journal article supplement (https://www.springermedizin.de/resource/supplementary/13069_2009_17_MOESM3_ESM.pdf/9659640)

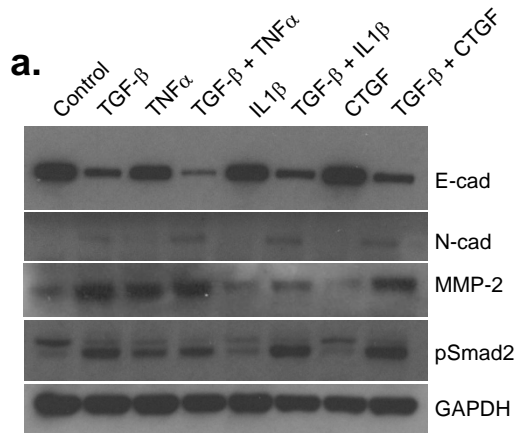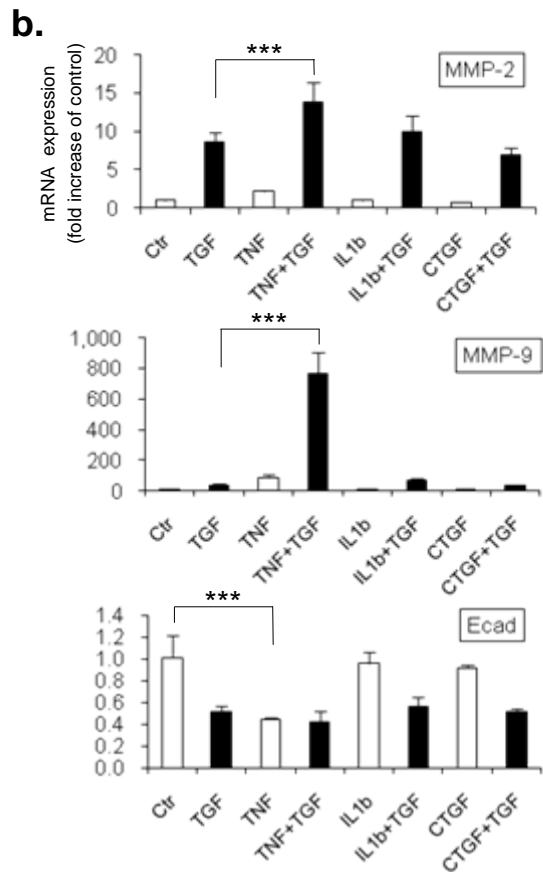

Supplement: MOESM3 [file 9659640]
